# Supplementary material for: Site I Inactivation Impacts Calmodulin Calcium Binding and Activation of Bordetella pertussis Adenylate Cyclase Toxin
Source: MDPI journal article supplement (doi:10.3390/toxins9120389), 2017-11-30
Supplement: s1 [file s1]

# Supplementary Materials: Site I Inactivation Impacts Calmodulin Calcium Binding and Activation of *Bordetella Pertussis* Adenylate Cyclase Toxin

Christian W. Johns and Natosha L. Finley

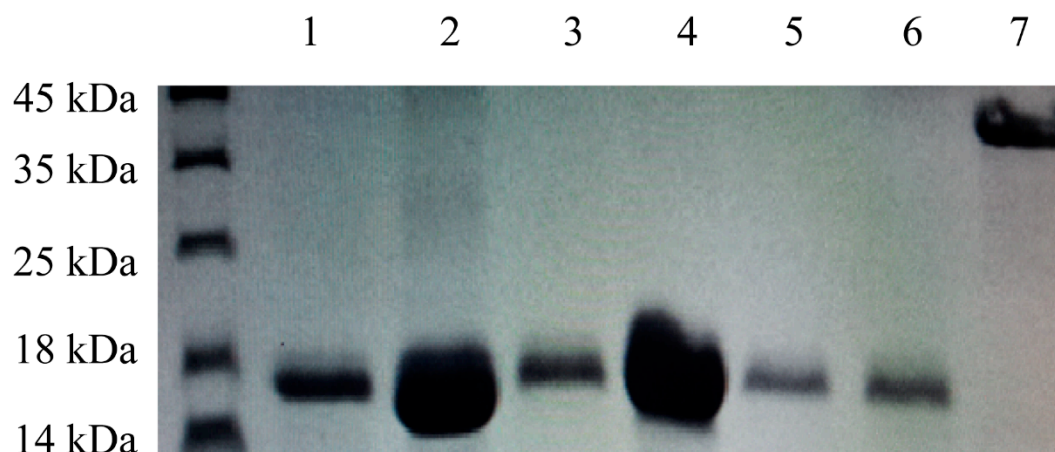

**Figure S1.** SDS-PAGE analysis of purified recombinant proteins. Prior to structural studies, purified recombinant proteins were analyzed by 20% SDS-PAGE: Molecular mass markers-14 kDa-45 kDa are displayed; Lanes 1–3 CaMWt; Lanes 4–6 D22A; Lane 7 CyaA-ACD.

**Table S1.** The ratio of  $\theta_{222}/\theta_{208}$  of CaMs determined in the presence and absence CyaA-ACD.

| Sample         | $\theta_{208}$ (mdeg) | $\theta_{222}$ (mdeg) | $\theta_{222}/\theta_{208}$ |
|----------------|-----------------------|-----------------------|-----------------------------|
| CaMWt          | −86.88                | −86.00                | 0.99                        |
| D22A           | −77.91                | −88.73                | 1.13                        |
| CyaA-ACD       | −86.93                | −78.06                | 0.75                        |
| CaMWt/CyaA-ACD | −88.08                | −83.24                | 0.94                        |
| D22A/CyaA-ACD  | −92.95                | −83.44                | 0.89                        |
